# Supplementary material for: A Cell-Permeant Nanobody-Based Degrader That Induces Fetal Hemoglobin
Source: ACS Cent Sci. 2022 Dec 14;8(12):1695–703. doi: 10.1021/acscentsci.2c00998 (PMC9801508; doi:10.1021/acscentsci.2c00998)
Supplement: Supplementary file 1 — oc2c00998_si_001.pdf [file oc2c00998_si_001.pdf]

## Supporting Information

### **A cell-permeant nanobody-based degrader that induces fetal hemoglobin**

Fangfang Shen,<sup>1,3</sup> Ge Zheng,<sup>2,3</sup> Makedlawit Setegne,<sup>1</sup> Karin Tenglin,<sup>2</sup> Manizheh Izadi,<sup>2</sup> Henry Xie,<sup>2</sup> Liting Zhai,<sup>1</sup> Stuart H. Orkin,<sup>2,\*</sup> Laura M. K. Dassama<sup>1,\*</sup>

<sup>1</sup>Department of Chemistry and Sarafan ChEM-H, Stanford University, Stanford, CA, USA.

<sup>2</sup>Dana Farber Boston Children's Cancer and Blood Disorders Center and Howard Hughes Medical Institute, Boston, MA, USA; Department of Pediatrics, Harvard Medical School, Boston, MA, USA.

<sup>3</sup>These authors contributed equally to this work.

\* Correspondence to: [dassama@stanford.edu](mailto:dassama@stanford.edu), [stuart\\_orkin@dfci.harvard.edu](mailto:stuart_orkin@dfci.harvard.edu)

#### **This PDF file includes:**

Materials and Methods

Supplemental Figures S1 – S14

Supplemental Tables S1– S6

#### **Materials and Methods**

***Safety hazards.*** No unexpected or unusually high safety hazards were encountered.

***Cell culture.*** HUDEP-2 cells (RCB4557) were obtained from Riken BioResource Research Center (Japan). Cells were cultured according to the reported method (33). In brief, cells were maintained in expansion medium, which contains StemSpan serum-free expansion medium (SFEM, Stemcell Technologies), 2% Penicillin-Streptomycin solution (10,000 U/mL stock), 50 ng/mL recombinant human stem cell factor (SCF, Stemcell Technologies), 3 IU/mL Epoetin alfa (Epogen, Amgen),

0.4 µg/mL dexamethasone, and 1 µg/mL doxycycline. For differentiation, cells were transferred from expansion medium to EDM-2, which contains Iscove's modified Dulbecco's medium (IMDM), 1% L-glutamine (this is in addition to the L-glutamine present in IMDM), 2% Penicillin-Streptomycin solution (10,000 U/mL stock concentration), 330 µg/mL human holo-transferrin, 10 µg/mL recombinant human insulin solution, 2 IU/mL heparin, 5% inactivated human plasma type AB, 3 IU/mL Epoetin alfa, 100 ng/mL SCF and 1 µg/mL doxycycline. After culturing for 4 days, cells were transferred to EDM-3 (same as EDM-2 but without SCF) and cultured for another 3 days. After that, cells were cultured in EDM (no doxycycline) for 2 days.

Human HEK293T cells (female) were purchased from ATCC. The cells were cultured in DMEM, high glucose (Thermo Fisher Scientific, 11965) with 10% FCS and 2 mM L-Glutamine.

Peripheral blood-derived CD34<sup>+</sup> cells from multiple donors were obtained from the NIDDK-Center of Excellence in Hematology at the Fred Hutchinson Cancer Research Center. The cells were cultured according to the reported method<sup>1</sup>. In brief, cells were cultured in erythroid differentiation medium (EDM) which contains IMDM supplemented with stabilized glutamine, 330 µg/mL holo-human transferrin, 10 µg/mL recombinant human insulin, 2 IU/mL heparin Choay, and 5% inactivated human plasma type AB. The expansion procedure comprised 3 steps. In the first step (Day 0 to Day 7), 10<sup>4</sup>/mL CD34<sup>+</sup> cells were cultured in EDM in the presence of 10<sup>-6</sup> M hydrocortisone (Stemcell Technologies), 100 ng/mL SCF, 5 ng/mL IL-3 (Stemcell Technologies), and 3 IU/mL Epoetin alfa. On Day 4, 1 volume of cell culture was diluted in 4 volumes of fresh medium containing SCF, IL-3, Epoetin alfa, and hydrocortisone. In the second step (Day 7 to Day 11), the cells were resuspended at 10<sup>5</sup>/mL in EDM supplemented with SCF and Epo. In the third step (Day 11 to Day 18), the cells were cultured in EDM supplemented with Epo alone. Cell counts were adjusted to a range of 7.5 × 10<sup>5</sup> - 1 × 10<sup>6</sup> on Day 11. Beyond Day 18, the culture medium containing Epo was renewed twice a week.

**Plasmid construction.** All gene blocks were obtained from GENEWIZ while primers were obtained from Integrated DNA Technologies. KOD hot start polymerase was used for PCR reaction, NEBuilder HiFi DNA Assembly was used for plasmid fusion. NdeI, XhoI and T4 ligase were purchased from New England Biolabs.

#### pET-20b\_2D9 Plasmid Construction

The sequence of 2D9 with a N-terminal Strep-tactin tag was codon-optimized for expression in *E. coli* and cloned into a linearized pET-20b vector at the NdeI and XhoI restriction sites.

#### pET-20b\_ZF5.3-2D9 Plasmid Construction

The sequence of ZF5.3 was codon optimized for expression in *E. coli* and cloned into a linearized pET20b\_2D9 plasmid with a N-terminal Strep-tactin tag.

#### pET-28a\_ZF5.3-2D9 -tSPOP Plasmid Construction:

The sequence of SPOP<sub>167-374</sub> was codon-optimized for expression in *E. coli* and cloned into a linearized pET-20b\_2D9 plasmid with a N-terminal Strep-tactin tag. After the HiFi assembly, pET-20b\_ZF5.3-2D9-tSPOP was digested with restriction enzymes NdeI and XhoI and ligated into pET-28a containing a N-terminal His<sub>6</sub> tag to obtain pET-28a\_ZF5.3-2D9-tSPOP plasmid.

#### pET-20b\_ZF5.3-2D9-tRNF4 Plasmid Construction:

The sequence of RNF4<sub>75-194</sub> was codon-optimized for expression in *E. coli* and cloned into a linearized pET-20b\_2D9 plasmid with a N-terminal Strep-tactin tag. Primers used are summarized in Table S1.

#### ***Expression and purification of proteins ZnF23, exZnF23 of BCL11A and exZnF23 of BCL11B.***

The cDNA of ZnF23 (residues 372-430) and exZnF23 (residues 372-484) of human BCL11A, exZnF23 of human BCL11B (residues 422-528) were cloned into pET28a vector and expressed as N-terminal His<sub>6</sub>-tag fusion proteins in *E. coli*. Cells were resuspended in lysis buffer (50 mM Tris-HCl pH 8.0, 300 mM NaCl, 10 mM imidazole, 1 mM DTT). After sonication and centrifugation, the supernatant was applied to the Ni<sup>2+</sup>-NTA resin (Qiagen) equilibrated with lysis buffer and incubated at 4°C for 1 hr. The resin was washed with wash buffer I (50 mM Tris-HCl pH 8.0, 1 M NaCl, 10 mM imidazole, 1 mM DTT), then wash buffer II (50 mM Tris-HCl pH 8.0, 300 mM NaCl, 10 mM imidazole, 1 mM DTT), and stepwise eluted with elution buffer (50 mM Tris-HCl pH 8.0, 300 mM NaCl, 100/200/300/500 mM imidazole, 1 mM DTT). The eluate was examined by SDS-PAGE stained with Coomassie blue. Fractions containing the target proteins were combined and then dialyzed with dialysis buffer (1×PBS, 150mM NaCl, 2mM DTT) at 4 °C

overnight and concentrated before loading onto the HiLoad 16/600 Superdex 75 prep-grade column (Cytiva) equilibrated with the purification buffer (1×PBS, 1 mM DTT). Purified proteins were concentrated, flash frozen in liquid nitrogen and stored at -80°C for yeast screening and binding assays.

***Isolation of BCL11A-exZnF23-binding nanobodies from yeast synthetic library.*** Purified exZnF23 of BCL11A protein was labeled with AlexaFluor647 dye (Invitrogen) or fluorescein isothiocyanate (FITC) (Sigma-Aldrich) according to the manufacturer's protocols.

For the first round of magnetic-activated cell sorting (MACS),  $1 \times 10^{10}$  *S. cerevisiae* cells expressing a surface displayed library of synthetic nanobodies (11) were centrifuged, resuspended in selection buffer (20 mM HEPES pH 7.5, 150 mM NaCl, 0.1% BSA, 5 mM maltose) and then incubated with anti-AlexaFluor647 microbeads (Miltenyi) at 4°C for 40 min. The yeast cells were then passed through an LD column (Miltenyi) to remove any yeast expressing nanobodies that non-specifically interacted with the microbeads. Yeast cells that flowed through the column were centrifuged, resuspended in selection buffer, and incubated with 1  $\mu$ M of AlexaFluor647-labeled exZnF23 of BCL11A at 4°C for 1 hr. Yeast cells were then centrifuged, resuspended in selection buffer with anti-AlexaFluor647 microbeads, and incubated at 4°C for 20 min before passing through an LS column (Miltenyi). The eluted yeast cells were collected and expanded to a subsequent round of MACS to further enrich for exZnF23-binding nanobodies. The second round of MACS was performed similarly to the first round but using fluorescein isothiocyanate (FITC)-labeled exZnF23 of BCL11A and anti-FITC microbeads. After MACS selections, yeast cells were co-stained with AlexaFluor647- and FITC-labeled exZnF23 of BCL11A and sorted by flow cytometry (Sony SH800Z). Double-positive yeast cells were selected and plated as single colonies, which were randomly picked and grown as clonal populations in 96-well plates. Yeast cells in 96-well plates were induced, stained with AlexaFluor647- or FITC-labeled exZnF23 of BCL11A and analyzed by the plate reader. Yeast DNA was extracted using standard methods and sequenced from the high activity clones.

***Affinity maturation of nanobody wt2D9.*** Error-prone PCR was performed on nanobody wt2D9 DNA using the GeneMorph II Random Mutagenesis Kit (Agilent) and the resulting library was scaled up with a second PCR using Q5 High-Fidelity DNA Polymerase (New England Biolabs).

10

recovered cells were resuspended in 100  $\mu$ L remaining media and added to ampicillin-(100  $\mu$ g/mL) or kanamycin-containing (50  $\mu$ g/mL) agar plates and incubated at 37 °C overnight.

### 2D9 expression and purification

The plasmid encoding Strep-2D9 was used to transform *E. coli* BL21 cells. Individual colonies were selected on the basis of Amp resistance and used to inoculate 50 mL of LB media supplemented with Amp (100 mg/L). The primary culture was grown overnight and then used to inoculate 6 L of ZYM-5052 autoinduction (AI) media<sup>3</sup> supplemented with ampicillin, which was then allowed to grow at 37 °C with shaking at 200 rpm. When the OD<sub>600nm</sub> reached 0.5, the temperature was changed to 18 °C and the cells cultured overnight. The cells were harvested by centrifugation at 6000  $\times$  g for 30 min at 4 °C, resuspended in buffer containing 25 mM Tris-HCl pH 8.0, 300 mM NaCl, and 10% glycerol, supplemented with 1 mM PMSF and lysed via microfluidization. The lysate was clarified by centrifuging at 15,000  $\times$  g for 30 min at 4 °C and the cleared lysate manually added to a column with 5 mL Strep-Tactin® Sepharose® resin (IBA Lifesciences). The column was washed with 5 column volumes of 25 mM Tris-HCl pH 8.0, 300 mM NaCl, and 10% glycerol. Then protein was eluted from the resin using 25 mM Tris-HCl pH 8.0, 300 mM NaCl, and 10% glycerol supplemented with 2 mM of desthiobiotin. Elution fractions were analyzed by SDS-PAGE, and fractions containing the desired protein combined and concentrated using spin concentrators (Millipore). Following concentration, proteins were additionally purified via size exclusion chromatography (Cytiva HiLoad 26/600 Superdex-200 pg column, #GE28-9898-36). Pure proteins were concentrated, flash frozen in liquid nitrogen, and stored at -80 °C until further use.

### ZF5.3-2D9 expression and purification

The plasmid encoding Strep-ZF5.3-2D9 was used to transform *E. coli* BL21 cells. Individual colonies were selected based on ampicillin resistance and used to inoculate 150 mL of LB media supplemented with ampicillin (100  $\mu$ g/mL). The primary culture was grown overnight and then used to inoculate 6 L of LB media supplemented with ampicillin, which was then allowed to grow at 37 °C with shaking at 200 rpm. At OD<sub>600nm</sub> of 0.5, protein expression was induced by the addition of IPTG to a final concentration of 0.5 mM. After culturing for overnight at 18 °C, cells were harvested by centrifugation (6000  $\times$  g, 30 min at 4 °C), resuspended in buffer containing 25

&lt;
